# Supplementary material for: Alu RNA Modulates the Expression of Cell Cycle Genes in Human Fibroblasts
Source: MDPI journal article supplement (doi:10.3390/ijms20133315), 2019-07-05
Supplement: s1 [file s1]

### Supplementary Figure S1

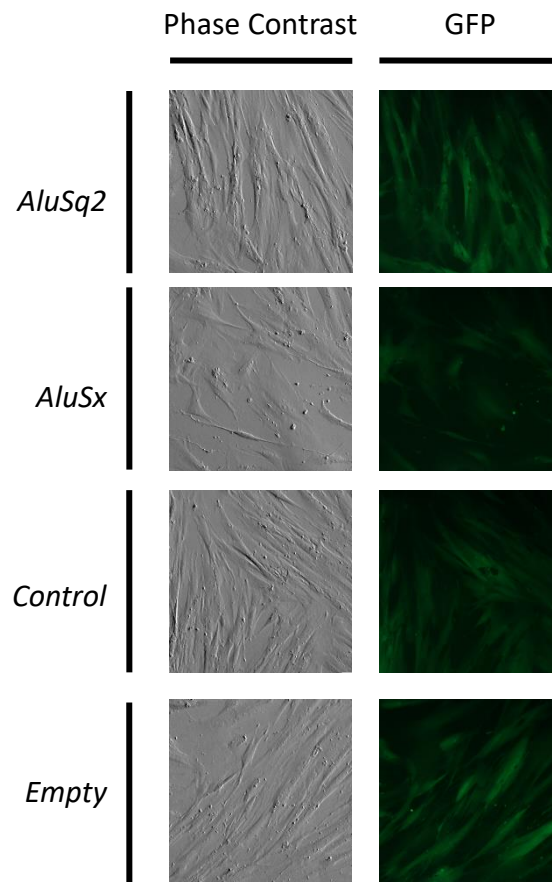

**Figure S1.** IMR90 cells overexpressing *AluSq2*, *AluSx*, Control or an empty lentivirus vector. Stable integrants were selected with puromycin treatment for two weeks. Only stably transformed cells were visualized as GFP-fluorescent cells. No big changes in cell morphology are observed comparing cells overexpressing *AluSq2*, *AluSx* or a control with cells transformed with an empty lentivirus vector.
